# Supplementary material for: Studying the Effect of MBNL1 and MBNL2 Loss in Skeletal Muscle Regeneration
Source: MDPI journal article supplement (doi:10.3390/ijms25052687), 2024-02-26
Supplement: s1 [file s1]

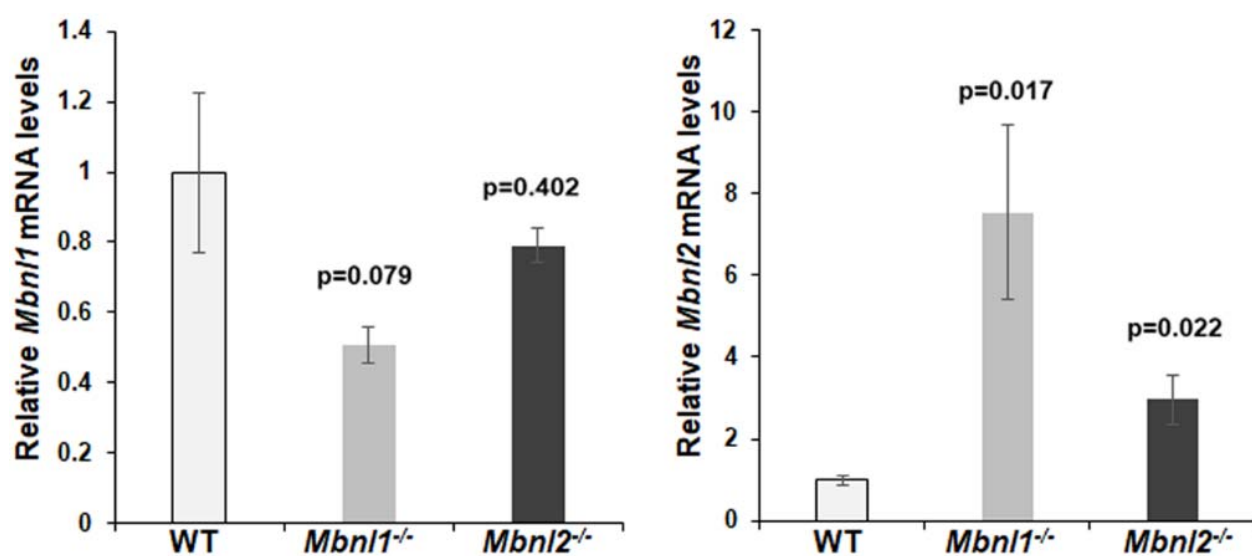

**Supplementary Figure S1.** Quantitative RT-PCR using primers spanning from exon 6 to exon 9 of *Mbnl1* and *Mbnl2* respectively. RNA from TA muscles. n=4 mice per genotype; error bars are mean  $\pm$  SEM; p values indicated for Student's T-tests.

**Supplementary Table S1. Primers for real-time RT-PCR**

| Gene                | Forward primer           | Reverse primer              | Annealing temp (°C) | PCR efficiency (%) |
|---------------------|--------------------------|-----------------------------|---------------------|--------------------|
| <i>Gapdh</i>        | AGGTCGGTGTGAACGGATTG     | TGTAGACCATGTAGTTGAGGT<br>CA | 62                  | 93                 |
| <i>Pax7</i>         | AGGACGACGAGGAAGGAGACA    | TCATCCAGACGGTTCCTTT         | 60                  | 98                 |
| <i>Myod</i>         | ATCCGCTACATCGAAGGTCTG    | CTCGACACAGCCGCACTCTTC       | 62                  | 98                 |
| <i>Myog</i>         | CCAGTGAATGCAACTCCCACAGC  | AGACATATCCTCCACCGTGA        | 59                  | 102                |
| <i>Col1a1</i>       | GAGCGGAGAGTACTGGATCG     | GCTTCTTTTCCTTGGGGTTC        | 61.4                | 97                 |
| <i>Col3a1</i>       | GCCCACAGCCTTCTACAC       | CCAGGGTCACCATTCTC           | 61.4                | 98                 |
| <i>Mbnl1(ex2-3)</i> | CCTTCGAAAAGCTGCCAAGTT    | CATGGCCATGTTCTTCTGCTG       | 62                  | 96                 |
| <i>Mbnl2(ex2-3)</i> | CAGGTTGAAAATGGAAGAGTAATT | GCTGCTGCAGTTTTTTGCTG        | 62                  | 98                 |
| <i>Mbnl1(ex6-9)</i> | CATGCAGTTACAGCAGCATAC    | GGTATCTGGTTGGCTGTGG         | 61.4                | 97                 |
| <i>Mbnl2(ex6-9)</i> | CTCGAAGCAACTGTAGACCTG    | GCTGTGCATCATGGGTACTG        | 61.4                | 96                 |
